# Supplementary material for: A family of uranyl oxide hydrate phases with bivalent cations [MII(H2O)4][(UO2)3O3(OH)2]·H2O (MII– Mn, Co, Ni, Zn): synthesis, characterization and chemical stability in aqueous solutions
Source: Royal Society of Chemistry journal article supplement (doi:10.1039/d1nj01414e), 2021-01-01
Supplement: d1nj01414e1.pdf [file d1nj01414e1.pdf]

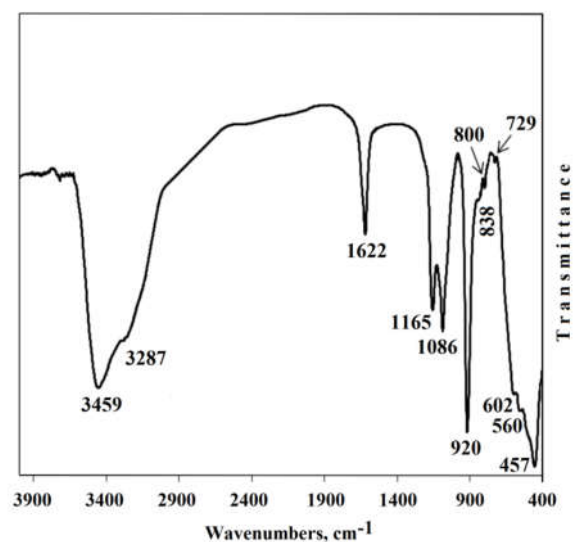

Figure 1 - Infrared spectrum of  $\text{MnU}_3\text{O}_{10} \cdot 6\text{H}_2\text{O}$

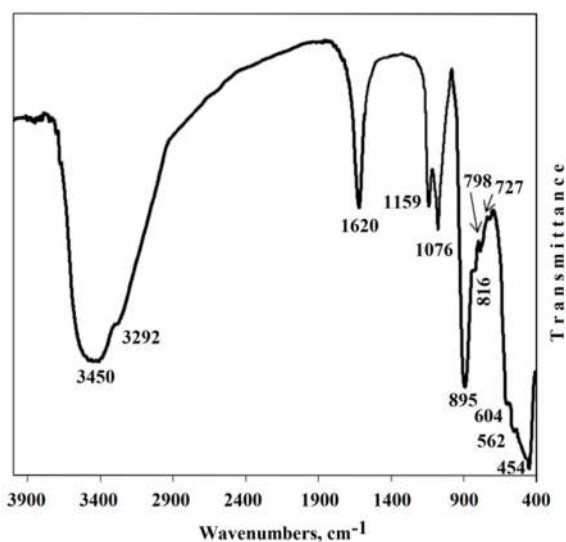

Figure 2 - Infrared spectrum of  $\text{NiU}_3\text{O}_{10} \cdot 6\text{H}_2\text{O}$

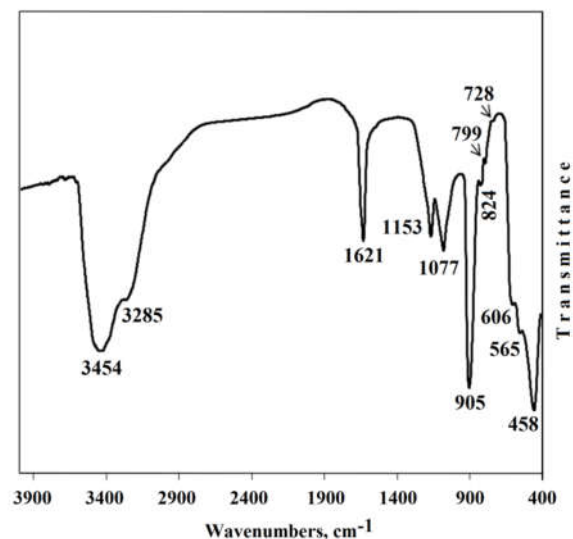

Figure 3 - Infrared spectrum of  $\text{ZnU}_3\text{O}_{10} \cdot 6\text{H}_2\text{O}$

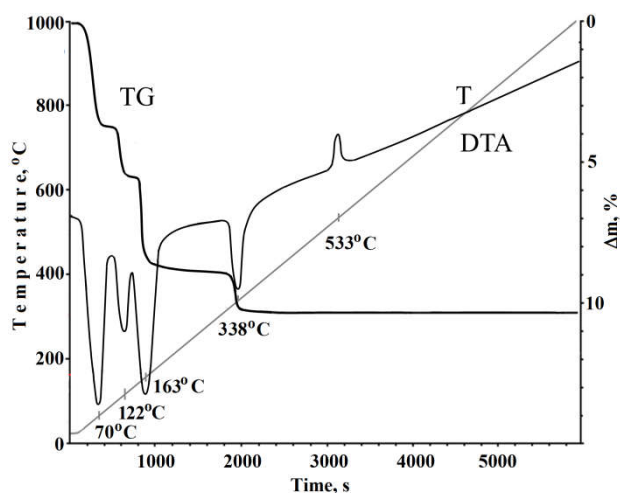

Figure 4 – Thermogravimetric (TG) and differential thermal analysis (DTA) curves for  $\text{MnU}_3\text{O}_{10} \cdot 6\text{H}_2\text{O}$  (T – temperature)

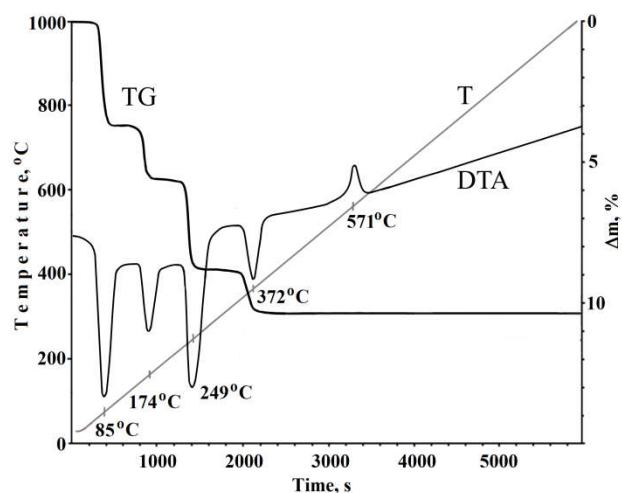

Figure 5 – Thermogravimetric (TG) and differential thermal analysis (DTA) curves for  $\text{NiU}_3\text{O}_{10} \cdot 6\text{H}_2\text{O}$  (T – temperature)

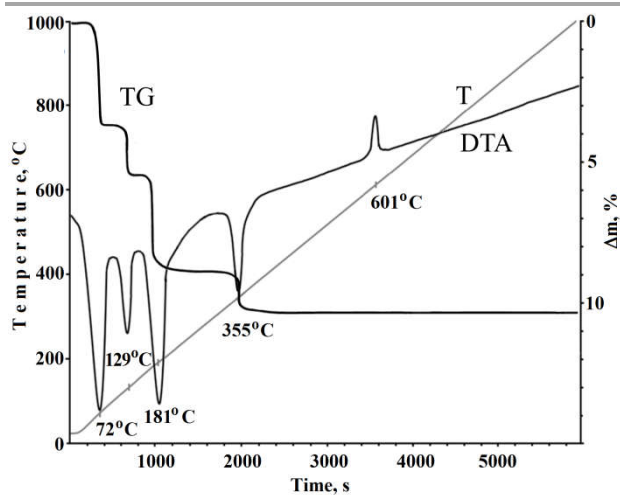

Figure 6 – Thermogravimetric (TG) and differential thermal analysis (DTA) curves for  $\text{ZnU}_3\text{O}_{10} \cdot 6\text{H}_2\text{O}$  (T – temperature)

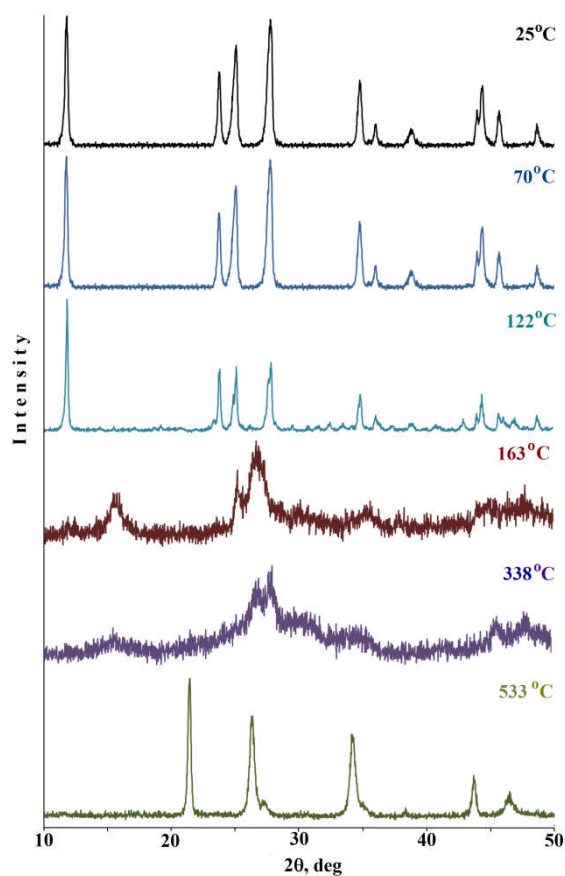

Figure 7 - X-ray diffraction patterns of the dehydration products of  $\text{MnU}_3\text{O}_{10} \cdot 6\text{H}_2\text{O}$

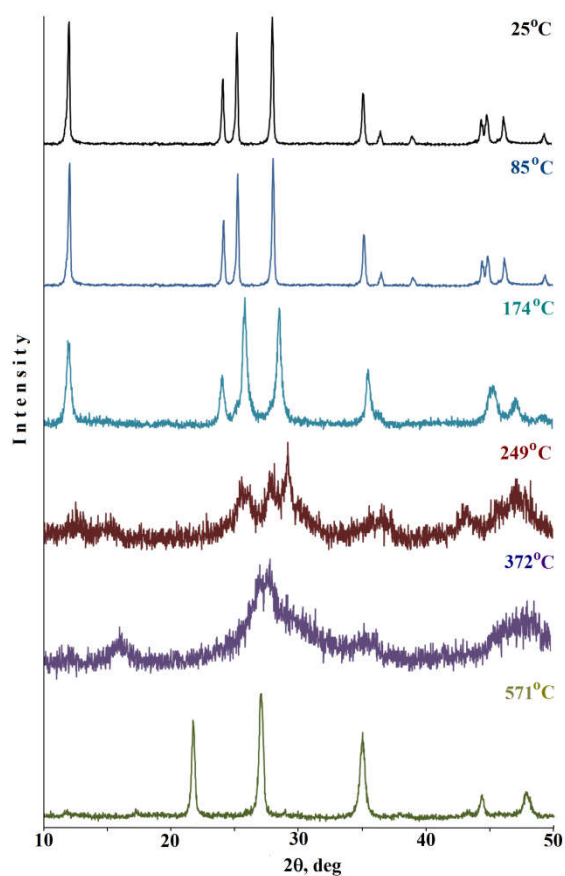

Figure 8 - X-ray diffraction patterns of the dehydration products of  $\text{NiU}_3\text{O}_{10} \cdot 6\text{H}_2\text{O}$

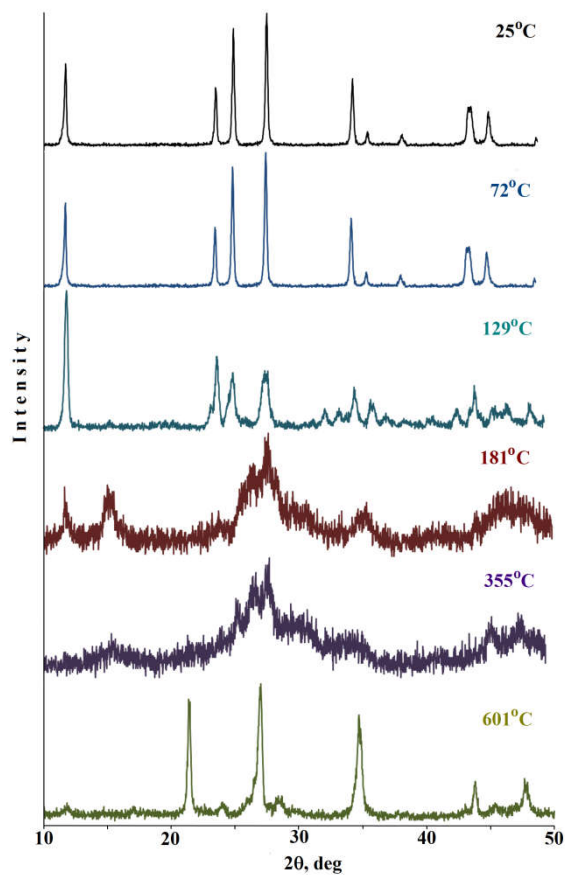

Figure 9 - X-ray diffraction patterns of the dehydration products of  $\text{ZnU}_3\text{O}_{10} \cdot 6\text{H}_2\text{O}$

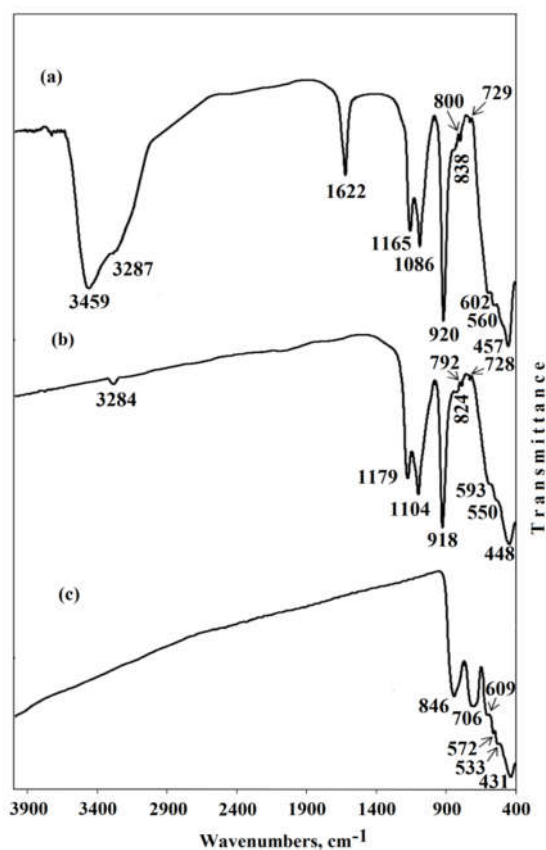

Figure 10 - Infrared spectra of  $\text{MnU}_3\text{O}_{10} \cdot 6\text{H}_2\text{O}$  (a) and its degradation products at 163°C (b); 533°C (c)

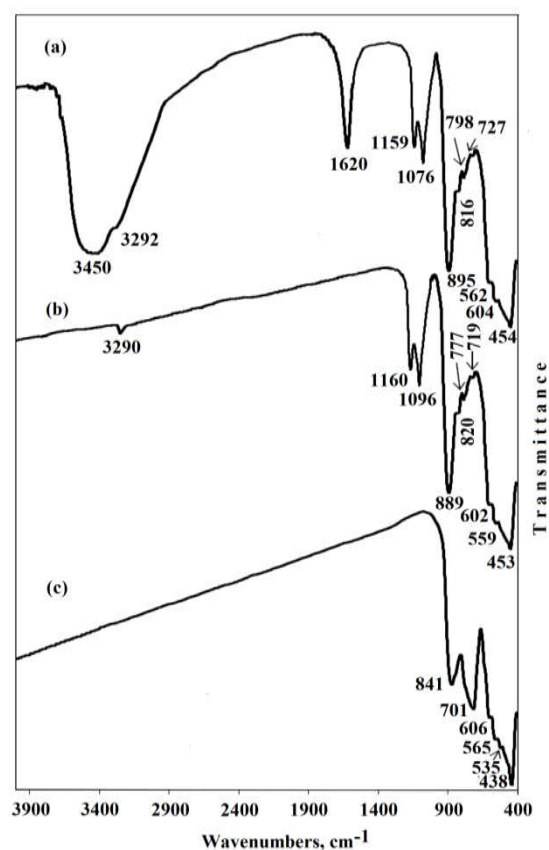

Figure 11 - Infrared spectra of  $\text{NiU}_3\text{O}_{10} \cdot 6\text{H}_2\text{O}$  (a) and its degradation products at 249°C (b); 571°C (c)

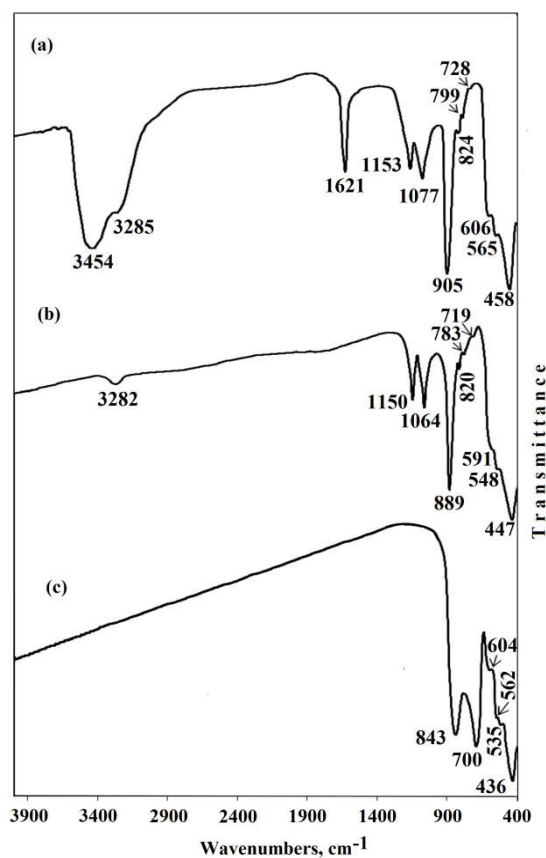

Figure 12 - Infrared spectra of  $\text{NiU}_3\text{O}_{10} \cdot 6\text{H}_2\text{O}$  (a) and its degradation products at 181°C (b); 601°C (c)

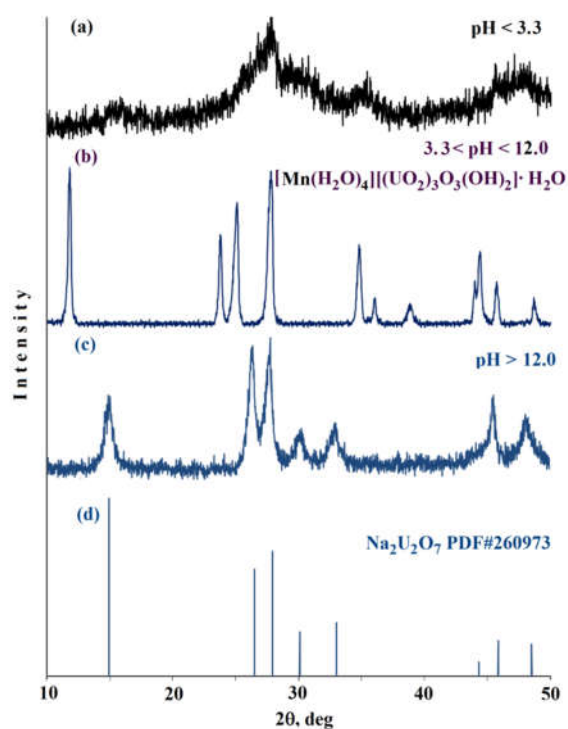

Figure 13 - X-ray diffraction patterns of solids in the « $[\text{Mn}(\text{H}_2\text{O})_4][(\text{UO}_2)_3\text{O}_3(\text{OH})_2] \cdot \text{H}_2\text{O}(\text{cr})$ —aqueous solution» system (a, b, c – experimental data; d - literature data)

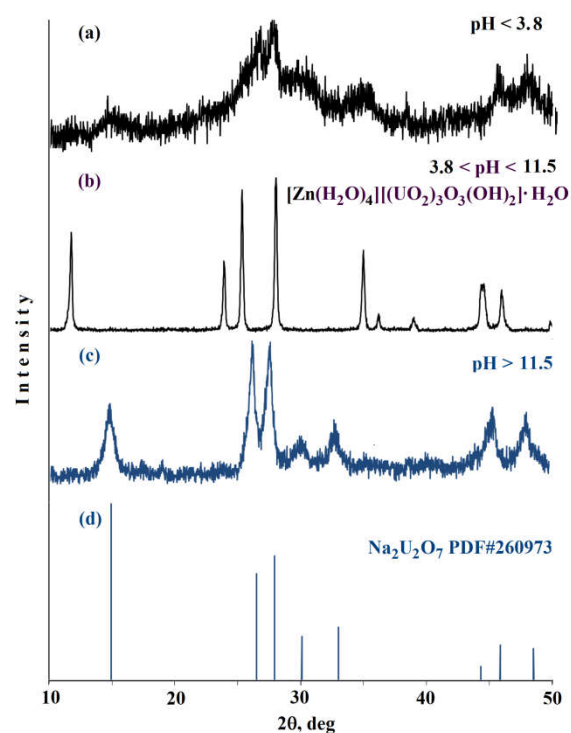

Figure 14 - X-ray diffraction patterns of solids in the « $[\text{Zn}(\text{H}_2\text{O})_4][(\text{UO}_2)_3\text{O}_3(\text{OH})_2] \cdot \text{H}_2\text{O}(\text{cr})$ —aqueous solution» system (a, b, c – experimental data; d - literature data)
